# Supplementary material
Source: publisher site journal article supplement (https://subtbiol.pensoft.net/article/71805/download/suppl/36/)
Supplement: Supplementary file 1

**Supplementary information for**

**Don’t forget the vertical perspective: assessment of distributional dynamics of cave-dwelling invertebrates in both ground and parietal microhabitats**

**Supplementary Table 3**

Supplementary Table 3. SIMPER Analysis. Taxa responsible for the observed differences between faunal assemblages in different sampling areas.

| SIMPER ANALYSIS 90.89 |  |  |  |
| --- | --- | --- | --- |
| TAXON | AVERAGE DISSIMILARITY | CONTRIBUTION % | CUMULATIVE % |
| Collembola, Entomobryidae indet. | 23.54 | 25.9 | 25.9 |
| *Amilenus aurantiacus* (Opiliones) | 9.094 | 10.01 | 35.9 |
| *Dolichopoda azami* (Orthoptera) | 7.071 | 7.78 | 43.68 |
| *Limonia nubeculosa* (Diptera) | 6.393 | 7.034 | 50.72 |
| Diptera, Limoniidae indet. | 6.326 | 6.96 | 57.68 |
| Diptera, Culicidae indet. | 4.484 | 4.934 | 62.61 |
| *Troglohyphantes iulianae* (Araneae) | 4.184 | 4.603 | 67.21 |
| Diptera, Mycetophilidae indet. | 3.197 | 3.518 | 70.73 |
| *Tegenaria silvestris* (Araneae) | 3.154 | 3.47 | 74.2 |
| Mesostigmata, Gamasida indet. | 2.515 | 2.767 | 76.97 |
| Collembola, Tomoceridae indet. | 2.041 | 2.246 | 79.21 |
| *Pimoa rupicola* (Araneae) | 1.651 | 1.816 | 81.03 |
| *Arrhopalites* sp. (Symphypleona) | 1.291 | 1.421 | 82.45 |
| Diptera, Phoridae indet. | 1.288 | 1.417 | 83.87 |
| *Duvalius gentilei gentilei* (Coleoptera) | 1.253 | 1.379 | 85.25 |
| Rhagidiidae indet. | 1.141 | 1.256 | 86.5 |
| *Plectogona* sp. (Chordeumatida) | 1.056 | 1.162 | 87.66 |
| *Sphodropsis ghilianii* (Coleoptera) | 0.9373 | 1.031 | 88.7 |
| Coleoptera, Staphylinidae indet. | 0.8076 | 0.8885 | 89.58 |
| *Chthonius* sp. (Pseudoscorpionida) | 0.7186 | 0.7907 | 90.37 |
| Lumbricidae indet. | 0.7097 | 0.7808 | 91.16 |
| *Lithobius* sp. (Lithobiomorpha) | 0.5945 | 0.6541 | 91.81 |
| *Holoscotolemon oreophilum* (Opiliones) | 0.5895 | 0.6486 | 92.46 |
| Acaro, Parasitidae Pergamasinae indet. | 0.5357 | 0.5894 | 93.05 |
| Diptera, Muscidae indet. | 0.5144 | 0.566 | 93.61 |
| *Polydesmus testaceus* (Polydesmida) | 0.5096 | 0.5607 | 94.17 |
| Diptera, Anthomyiidae indet. | 0.4996 | 0.5497 | 94.72 |
| *Eupolybothrus longicornis* (Lithobiomorpha) | 0.4885 | 0.5374 | 95.26 |
| *Metellina merianae* (Araneae) | 0.4772 | 0.525 | 95.79 |
